# Supplementary material for: Does workplace health promotion contribute to job stress reduction? Three-year findings from Partnering Healthy@Work
Source: PubMed Central journal article supplement (PMC4690240; doi:10.1186/s12889-015-2625-1), 2015-12-24
Supplement: 12889_2015_2625_MOESM3_ESM.pdf [file 12889_2015_2625_MOESM3_ESM.pdf]

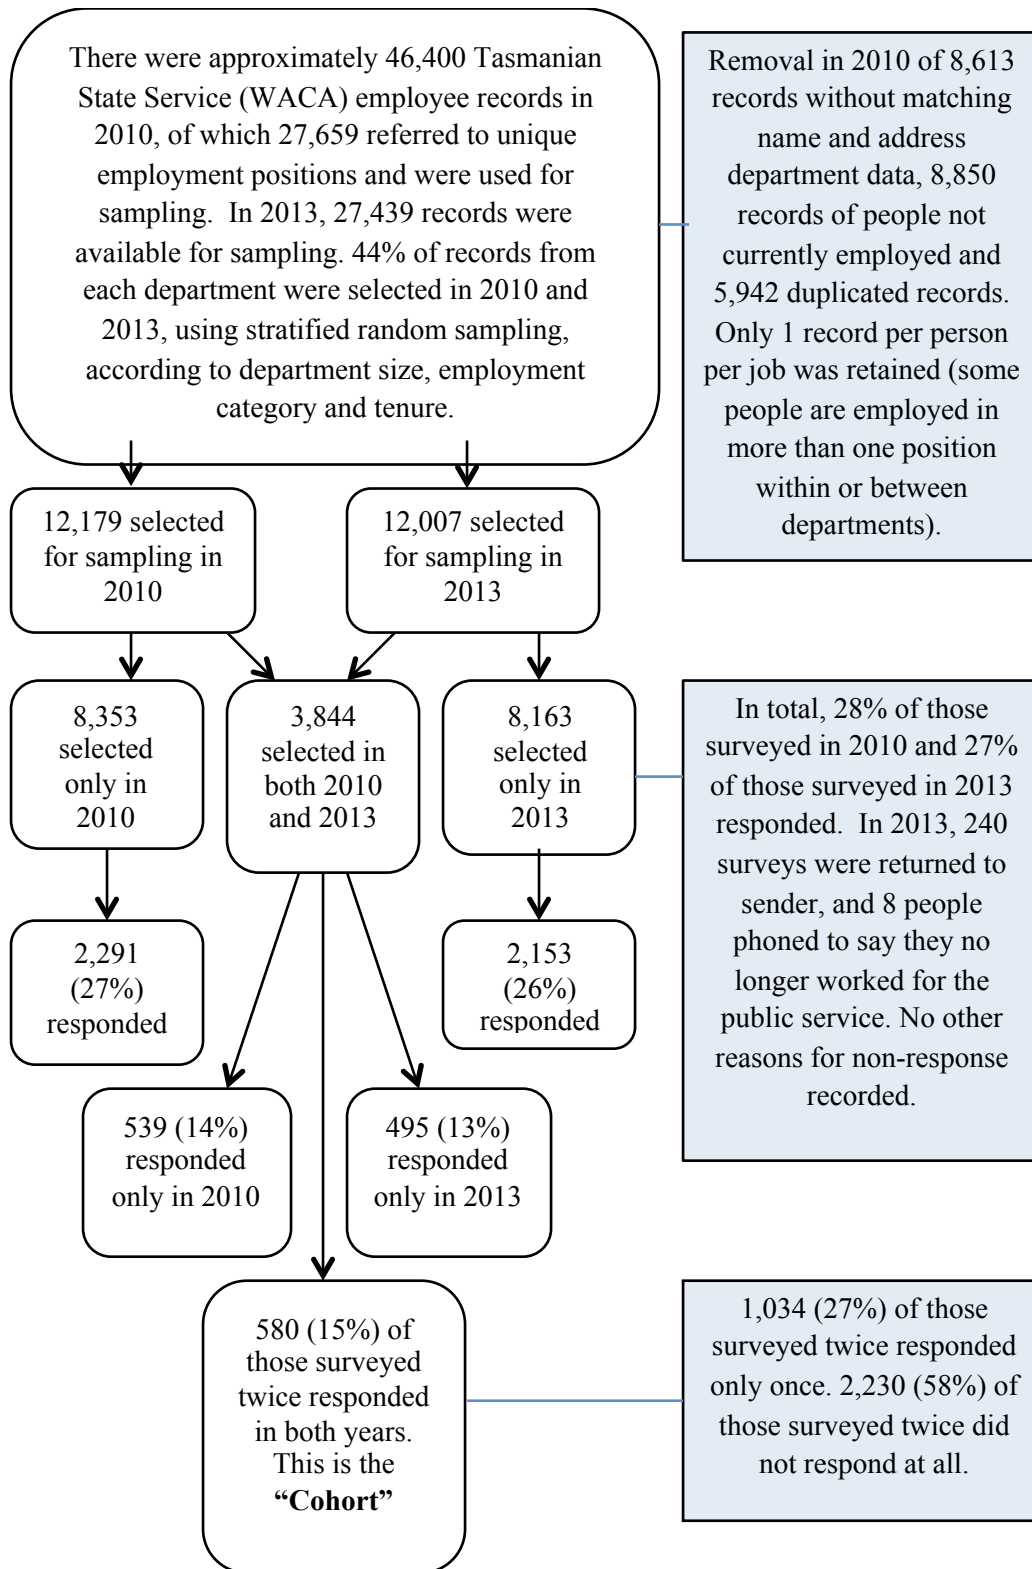

Additional Figure 3. Flowchart showing sampling and responses to the Partnering Healthy@Work surveys as at November 2014.
