# Supplementary material for: Does workplace health promotion contribute to job stress reduction? Three-year findings from Partnering Healthy@Work
Source: PubMed Central journal article supplement (PMC4690240; doi:10.1186/s12889-015-2625-1), 2015-12-24
Supplement: 12889_2015_2625_MOESM5_ESM.pdf [file 12889_2015_2625_MOESM5_ESM.pdf]

Additional Table 2 Cohort characteristics for the 2010 and 2013 *Partnering Healthy@Work* surveys.

|                                     | Men (n = 161) |      |       |      | $p^2$ | Women (n= 423) |      |        |      | $p$    |
|-------------------------------------|---------------|------|-------|------|-------|----------------|------|--------|------|--------|
|                                     | 2010          |      | 2013  |      |       | 2010           |      | 2013   |      |        |
|                                     | Mean          | SD   | Mean  | SD   |       | Mean           | SD   | Mean   | SD   |        |
| <u>Continuous Variables</u>         |               |      |       |      |       |                |      |        |      |        |
| Age [years, mean] (SE) <sup>1</sup> | 44.1          | 0.75 | 46.9  | 0.79 | 0.210 | 45.8           | 0.46 | 48.8   | 0.47 | <0.001 |
| Tenure (SE)                         | 13.3          | 0.81 | 16.5  | 0.84 | 0.032 | 12.66          | 0.47 | 15.7   | 0.48 | <0.001 |
| Hours worked (SE)                   | 43.0          | 1.10 | 41.17 | 1.01 | 0.007 | 36.9           | 0.78 | 36.7   | 0.80 | 0.146  |
| Annual Salary (\$AU) <sup>1</sup>   | 74,182        | 2797 | 84554 | 2746 | 0.101 | 61,865         | 861  | 71,687 | 908  | 0.354  |
| <u>Categorical Variables</u>        |               |      |       |      |       |                |      |        |      |        |
|                                     | %             | n    | %     | n    |       | %              | n    | %      | n    |        |
| <u>Marital Status</u>               |               |      |       |      |       |                |      |        |      |        |
| Married/ Partner                    | 94            | 133  | 93    | 138  | ref   | 83             | 309  | 85     | 324  | ref    |
| Not married                         | 6             | 9    | 7     | 10   | 0.365 | 17             | 62   | 15     | 59   | 0.375  |
| <u>Education</u>                    |               |      |       |      |       |                |      |        |      |        |
| Post school                         | 66            | 88   | 68    | 92   | ref   | 67             | 211  | 65     | 219  | ref    |
| Middle school                       | -             | -    | -     | -    | 0.006 | 2              | 4    | 2      | 7    | 0.583  |
| Upper school                        | 34            | 46   | 32    | 44   | 0.569 | 32             | 100  | 33     | 109  | 0.482  |
| <u>Employment band</u>              |               |      |       |      |       |                |      |        |      |        |
| Low/mid band                        | 74            | 119  | 77    | 124  | ref   | 90             | 379  | 91     | 386  | ref    |
| High/very high band                 | 26            | 42   | 23    | 37   | 0.689 | 10             | 44   | 9      | 37   | 0.234  |
| <u>Employment Category</u>          |               |      |       |      |       |                |      |        |      |        |
| Permanent                           | 90            | 145  | 90    | 146  | ref   | 95             | 403  | 98     | 414  | ref    |
| Fixed-term/ casual                  | 10            | 16   | 10    | 15   | 0.041 | 5              | 20   | 2      | 9    | <0.001 |
| <u>Employment Condition</u>         |               |      |       |      |       |                |      |        |      |        |
| Full-time                           | 90            | 146  | 88    | 142  | ref   | 53             | 226  | 49     | 207  | ref    |
| Part-time                           | 10            | 15   | 12    | 19   | 0.006 | 47             | 197  | 51     | 216  | 0.248  |
| <u>Days worked</u>                  |               |      |       |      |       |                |      |        |      |        |
| Mon to Fri                          | 76            | 122  | 75    | 118  | ref   | 54             | 229  | 66     | 221  | ref    |
| Days Vary Weekly                    | 18            | 28   | 18    | 29   | 0.659 | 14             | 59   | 17     | 59   | 0.148  |
| Other                               | 6             | 11   | 7     | 11   | 0.054 | 32             | 133  | 17     | 59   | 0.555  |

<sup>1</sup> Based on full-time equivalent hours.

<sup>2</sup> Comparison made between total cohort group and total survey respondent group.
