# Supplementary material for: Does workplace health promotion contribute to job stress reduction? Three-year findings from Partnering Healthy@Work
Source: PubMed Central journal article supplement (PMC4690240; doi:10.1186/s12889-015-2625-1), 2015-12-24
Supplement: 12889_2015_2625_MOESM6_ESM.pdf [file 12889_2015_2625_MOESM6_ESM.pdf]

Additional Table 3 Ratios of mean reported availability of and participation in Healthy@Work initiatives in 2013 relative to 2010.

|                      | Men            |                         |        |          |           | Women       |                 |                |      |      |      |        |
|----------------------|----------------|-------------------------|--------|----------|-----------|-------------|-----------------|----------------|------|------|------|--------|
|                      | Mean (SE)      | Mean Ratio <sup>1</sup> | 95% CI | <i>p</i> | Mean (SE) | Mean Ratio  | 95% CI          | <i>p</i>       |      |      |      |        |
| <b>Availability</b>  | <i>2010</i>    | <i>2013</i>             |        |          |           | <i>2010</i> | <i>2013</i>     |                |      |      |      |        |
| Total                | 0.41<br>(0.01) | 0.46<br>(0.01)          | 1.14   | 1.10     | 1.19      | <0.001      | 0.38<br>(<0.01) | 0.42<br>(0.01) | 1.14 | 1.11 | 1.17 | <0.001 |
| <b>Participation</b> |                |                         |        |          |           |             |                 |                |      |      |      |        |
| Total                | 1.97<br>(0.24) | 4.85<br>(1.20)          | 1.93   | 1.71     | 2.17      | <0.001      | 1.66<br>(0.11)  | 3.77<br>(0.29) | 2.16 | 2.00 | 2.34 | <0.001 |

<sup>1</sup> Ratio of estimated mean exposures to Healthy@Work in 2013 relative to 2010.
