# Supplementary material for: Does workplace health promotion contribute to job stress reduction? Three-year findings from Partnering Healthy@Work
Source: Springer Nature journal article supplement (doi:10.1186/s12889-015-2625-1), 2015-12-01
Supplement: MOESM1 [file 9751090]

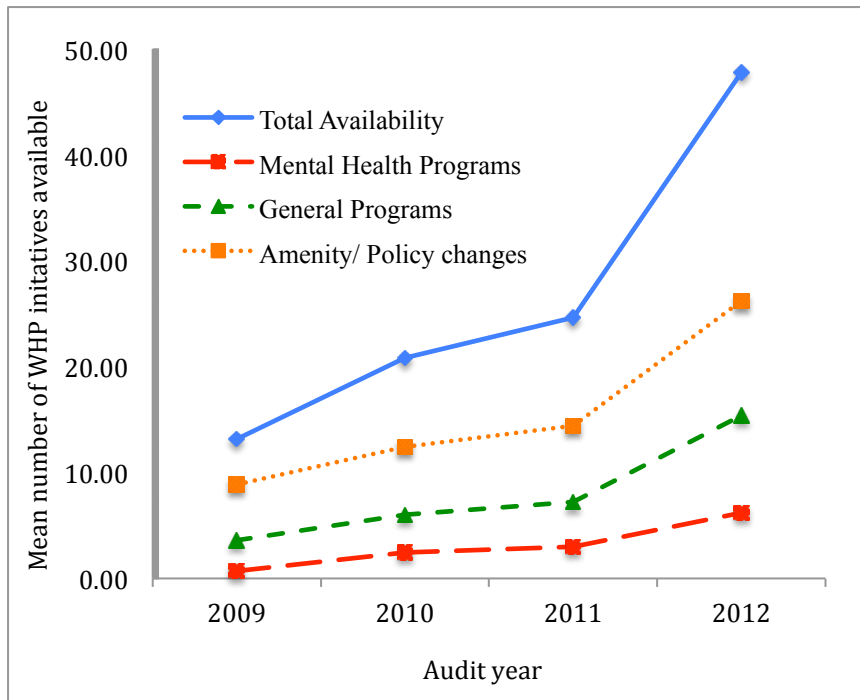

Additional Figure 1. Mean numbers of available Workplace Health Promotion (WHP) initiatives per department reported through Tasmanian Government audits between 2009 and 2012.
