# Supplementary material for: Does workplace health promotion contribute to job stress reduction? Three-year findings from Partnering Healthy@Work
Source: Springer Nature journal article supplement (doi:10.1186/s12889-015-2625-1), 2015-12-01
Supplement: MOESM4 [file 9751090]

Additional Table 1. Comparisons of respondents and non-respondents for Partnering Healthy@Work surveys in 2010 and 2013 by age, tenure, employment condition and employment category, stratified by sex

|                                  | <b>Respondents</b>    | <b>Non-respondents</b> | <b>Test statistic (df)</b> | <b>p-value</b> |
|----------------------------------|-----------------------|------------------------|----------------------------|----------------|
| <b>2010</b>                      | <b>Men (n=4053)</b>   |                        |                            |                |
| n                                | 947                   | 3106                   |                            |                |
| Mean age (SD)                    | 46.99 (0.34)          | 44.37 (0.19)           | t(4051)=-6.6               | <0.001         |
| Mean tenure (years (SD))         | 14.18 (0.38)          | 12.37 (0.20)           | t(4051)=-4.4               | <0.001         |
| % full-time                      | 84.69                 | 83.77                  | chi2(1)=0.5                | 0.500          |
| % permanent                      | 88.38                 | 85.64                  | chi2(1)=4.6                | 0.030          |
| <b>2013</b>                      | <b>Men (n=3865)</b>   |                        |                            |                |
| n                                | 917                   | 2948                   |                            |                |
| Mean age (SD)                    | 47.64 (0.34)          | 44.87 (0.21)           | t(3863)=-6.7               | <0.001         |
| Mean tenure (years (SD))         | 14.90 (0.39)          | 12.25 (0.20)           | t(3863)=-6.5               | <0.001         |
| % full-time                      | 84.30                 | 79.85                  | chi2(1)=8.9                | 0.003          |
| % permanent                      | 85.71                 | 84.46                  | chi2(1)=0.8                | 0.360          |
| <b>2010</b>                      | <b>Women (n=8126)</b> |                        |                            |                |
| n                                | 2422                  | 5704                   |                            |                |
| Mean age (SD)                    | 45.84 (0.21)          | 44.36 (0.14)           | t(8124)=-5.7               | <0.001         |
| Mean tenure (years (SD))         | 12.72 (0.21)          | 11.41 (0.13)           | t(8124)=-5.4               | <0.001         |
| % full-time                      | 50.87                 | 48.28                  | chi2(1)=4.5                | 0.030          |
| % permanent                      | 92.53                 | 89.46                  | chi2(1)=18.3               | <0.001         |
| <b>2013</b>                      | <b>Women (n=8142)</b> |                        |                            |                |
| n                                | 2311                  | 5831                   |                            |                |
| Mean age (SD)                    | 46.80 (0.21)          | 44.80 (0.15)           | t(8140)=-7.3               | <0.001         |
| Mean service length (years (SD)) | 13.03 (0.21)          | 11.98 (0.13)           | t(8140)=-4.2               | <0.001         |
| % full-time                      | 47.81                 | 43.32                  | chi2(1)=13.5               | <0.001         |
| % permanent                      | 88.01                 | 85.10                  | chi2(1)=11.6               | 0.001          |
